# Supplementary material for: A Visual Circuit Linked To The Lateral Hypothalamus Mediates The Food Consumption-Suppressing And Weight Gain-Attenuating Effects Of Bright Light Treatment
Source: Research Square preprint supplement (doi:10.21203/rs.3.rs-5778526/v1), 2025-01-28
Supplement: Supplementary file 1 [file 6fe6ac912677d900f0fc6237.docx]

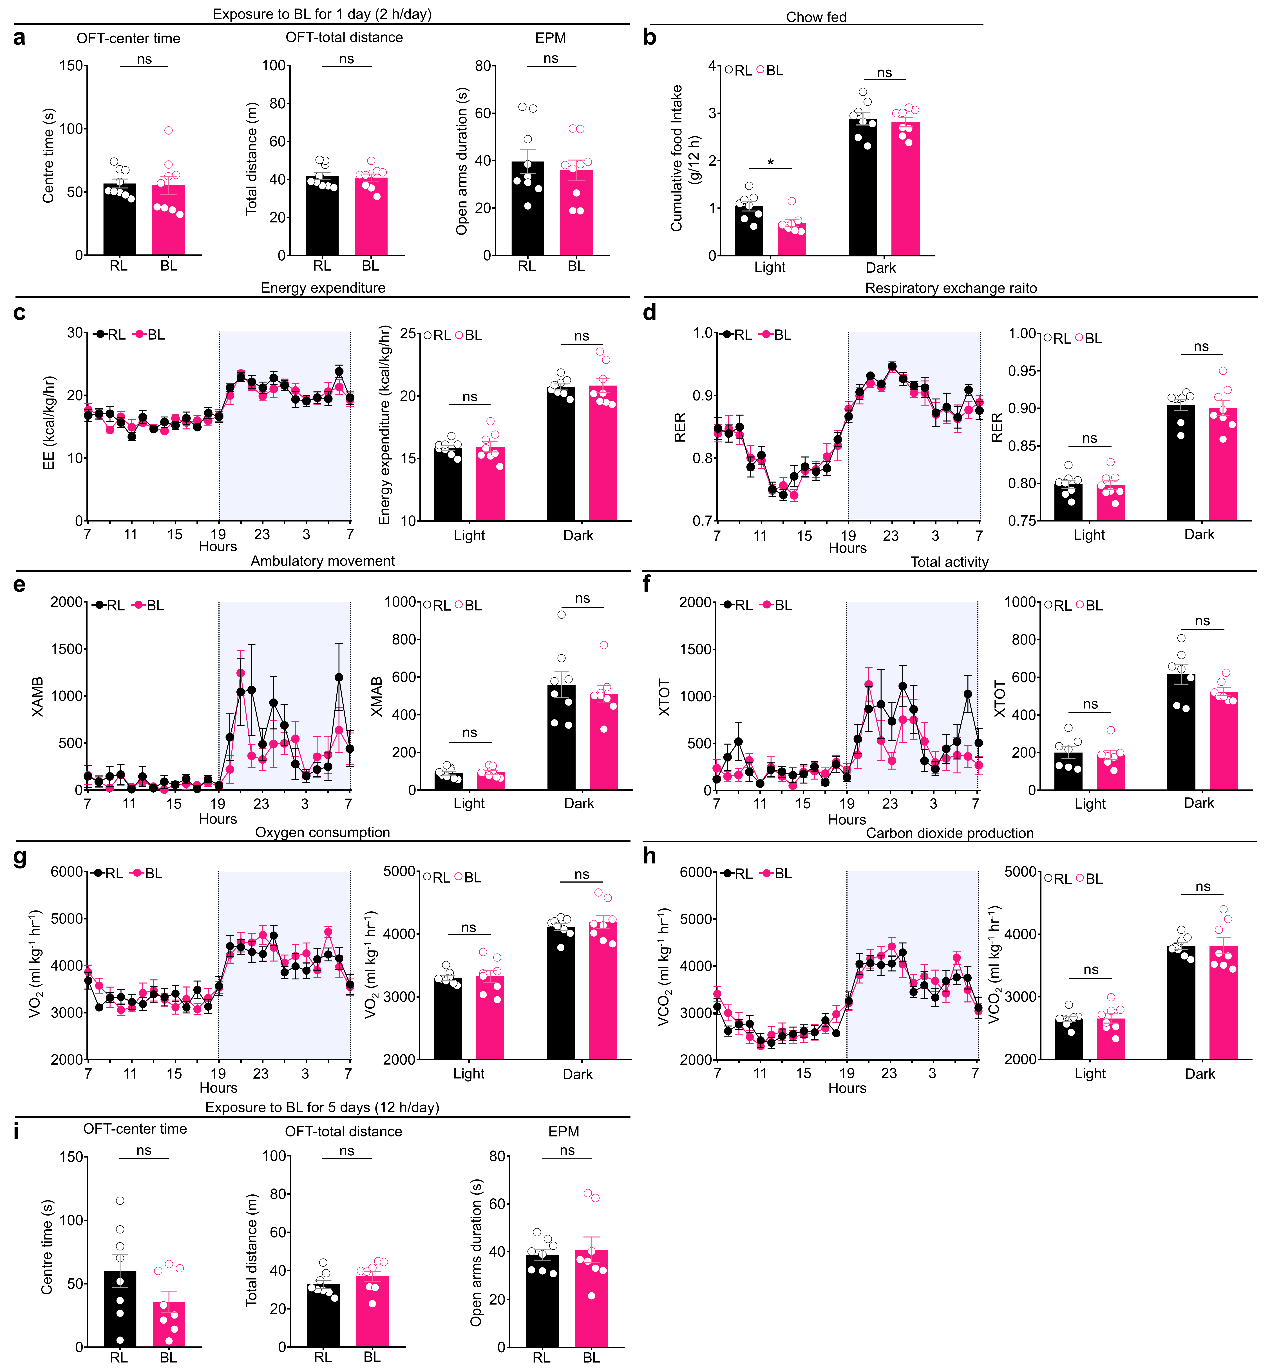


**Figure S1.** **Bright light treatment has no impact on metabolism or anxiety-related behaviors, Related to Figure 1**

**a**, Acute exposure to bright light treatment did not significantly influence the anxiety-like behaviors tested in the open-field test (OFT) and elevated plus maze test (EPM); n= 9 mice/group.

**b**, Quantitative date of cumulative food consumption; n= 8 mice/group.

**c**, Left, energy expenditure (EE) of chow-fed mice at RL (200 lux) and BL (3000 lux) are record for 24 h; n=8 mice/group. Each symbol represents the mean of eight individual mice. Right, quantitative date of energy expenditure is presented as mean ± s.e.m; n=8 mice/group.

**d**, Left, respiratory exchange ratio (RER) of chow-fed mice at RL and BL are record for 24 h; n=8 mice/group. Right, quantitative date of RER is presented as mean ± s.e.m; n=8 mice/group.

**e**, Left, ambulatory movement (XAMB) of chow-fed mice at RL and BL are record for 24 h; n=8 mice/group. Right, quantitative date of ambulatory movement; n=8 mice/group.

**f**, Left, total activity (XTOT) of chow-fed mice at RL and BL are record for 24 h; n=8 mice/group. Right: quantitative of total activity; n=7 mice/group.

**g**, Left, oxygen consumed (VO2) of chow-fed mice at RL and BL are record 24 h; n= 8 mice/group. Right, quantitative date of VO2; n= 8 mice/group.

**h**, Left, carbon dioxide consumed (VCO2) at RL and BL are record for 24 h; n= 8 mice/group. Right, quantitative of VCO2; n= 8 mice/group.

**i**, Depressive- and anxiety-like behaviors after exposure to RL (200 lux) and BL (3000 lux, 12 h) for 5 days; n= 8 mice/group.

One-way ANOVA with Sidak’s multiple-comparisons test was used in all figure. *p < 0.05; ns, no significant difference. Error bars indicate the mean ± s.e.m.


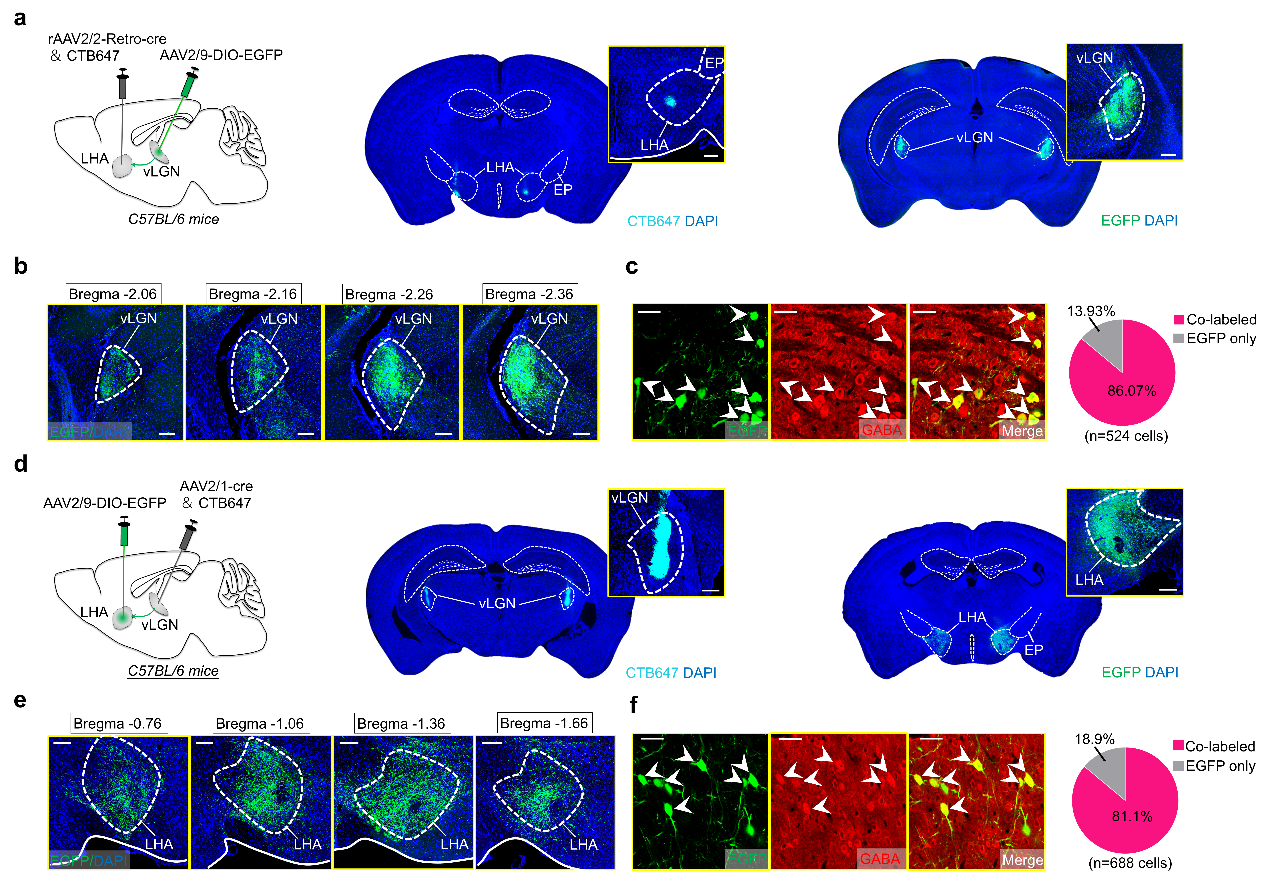


**Figure S2. vLGN neurons inhibit LH GABAergic neurons through direct projections,** **Related to Figure 4**

**a**, Left, scheme for specific labeling of LHA-projecting vLGN neurons with EGFP. Right, representative images of the vLGN and LHA 2 weeks after virus injections, in which the location of the injection site of rAAV2/2-Retro-cre was visualized with CTB-647; scale bar, 200 μm.

**b**, A representative example of LHA-projecting vLGN neurons labeled with EGFP (number indicate distance from bregma); scale bar, 200 μm.

**c**, Left, representative images of the vLGN illustrating EGFP-expressing vLGN neurons co-labeled with GABAergic neurons. Right, pie chart indicates percentage of EGFP-expressing vLGN neurons co-labeled with GABAergic neurons; scale bar, 50 μm

**d**, Left, scheme for specific labeling of LHA neurons receiving direct vLGN inputs with EGFP. Right: representative images of vLGN and LHA neurons 2 weeks after virus injections, in which the location of the injection site of AAV2/1-cre was visualized with CTB-647; scale bar, 200 μm.

**e**, Representative example showing LHA postsynaptic neurons with EGFP. (number indicate distance from bregma); scale bar, 200 μm.

**f**, Left, a representative images of LHA illustrating EGFP-expressing LHA neurons co-labeled with GABAergic neurons. Right, pie chart indicates percentage of EGFP-expressing LHA neurons co-labeled with GABAergic neurons; scale bar, 50 μm.

**g**, Labeling of vLGN/lGL GABAergic neurons with ChR2 and LHA GABAergic neurons with EGFP; scale bar, 200 μm (Left) and 25 μm (Right).

**h**, Optogenetically evoked PSCs in LHA GABAergic neurons with EGFP; n= 36 cells.

**
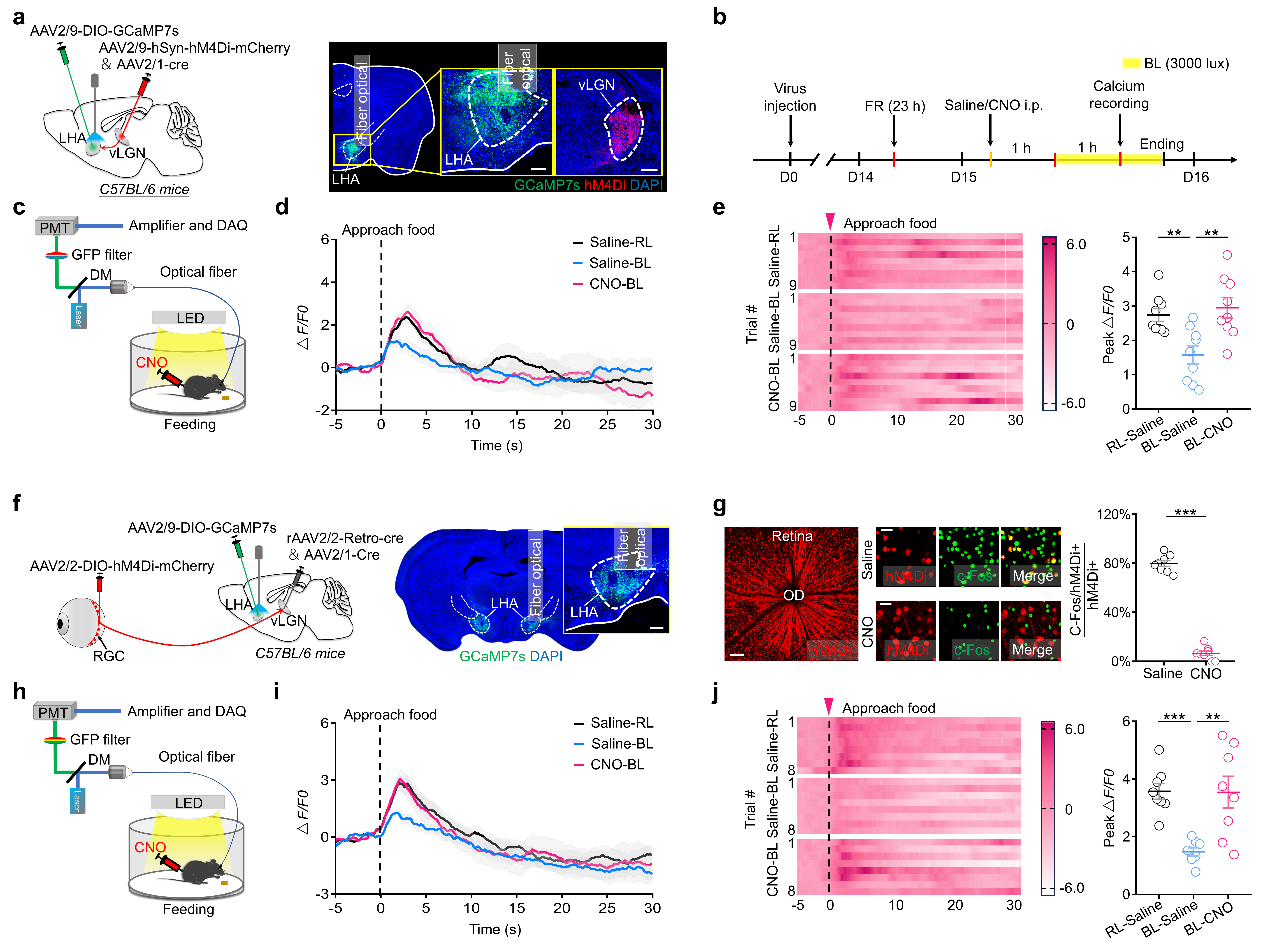
**

**Figure S3. Bright light treatment inhibits the excitatory effect of food intake on LHA neurons,** **Related to Figure 6**

**a**, Illustration of unilateral implantation of optical fiber in the LHA of mice that received LHA injection of AAV2/9-DIO-GCaMP7s and vLGN injection of AAV2/1-cre and AAV2/9-hSyn-hM4Di-mCherry; scale bar, 200 μm.

**b**, Schematic representation of the experimental timeline designed for recording feeding behavior using fiber photometry under bright light (BL, 3000 lux).

**c**, Experimental model for recording feeding behavior using fiber photometry under BL (3000 lux).

**d**, Average photometry trace for mice approach food in different groups; n=9 mice/group.

**e**, Left, heatmap showing photometry recordings from different trial of mice approaching food in different groups; n=9 mice/group. Right, the amplitude of Ca2+ signal in different groups; n=9 mice/group.

**f**, Illustration of unilateral implantation of optical fiber in the LHA of mice that received LHA injection of AAV2/9-DIO-GCaMP7s, vLGN injection of AAV2/1-cre and rAAV2/2-Retro-cre and retina injection of AAV2/2-DIO-hM4Di-mCherry; scale bar, 200 μm.

**g**, Left, representative images of specific labeling of vLGN-projecting RGCs with hM4Di-mCherry. Right, i.p. injection of CNO (1 mg/kg) decreased BL-induced c-Fos expression in vLGN-projecting RGCs expressing hM4Di; n= 8 mice/group. Left scale bar, 200 μm; Right scale bar, 25 μm.

**h**, Experimental model for recording feeding behavior using fiber photometry under BL (3000 lux).

**i**, Average photometry trace for mice approach food in different groups; n=8 mice/group.

**j**, Left, heatmap showing photometry recordings different trials of mice approach food in different groups; n=8 mice/group. Right, the amplitude of Ca2+ signal in different groups; n=8 mice/group.

One-way ANOVA with Sidak’s multiple-comparisons test was used in **e** (right), **g** (right), and **j** (right). **p < 0.001; ***p < 0.0001; ns, no significant difference. Error bars indicate the mean ± s.e.m.


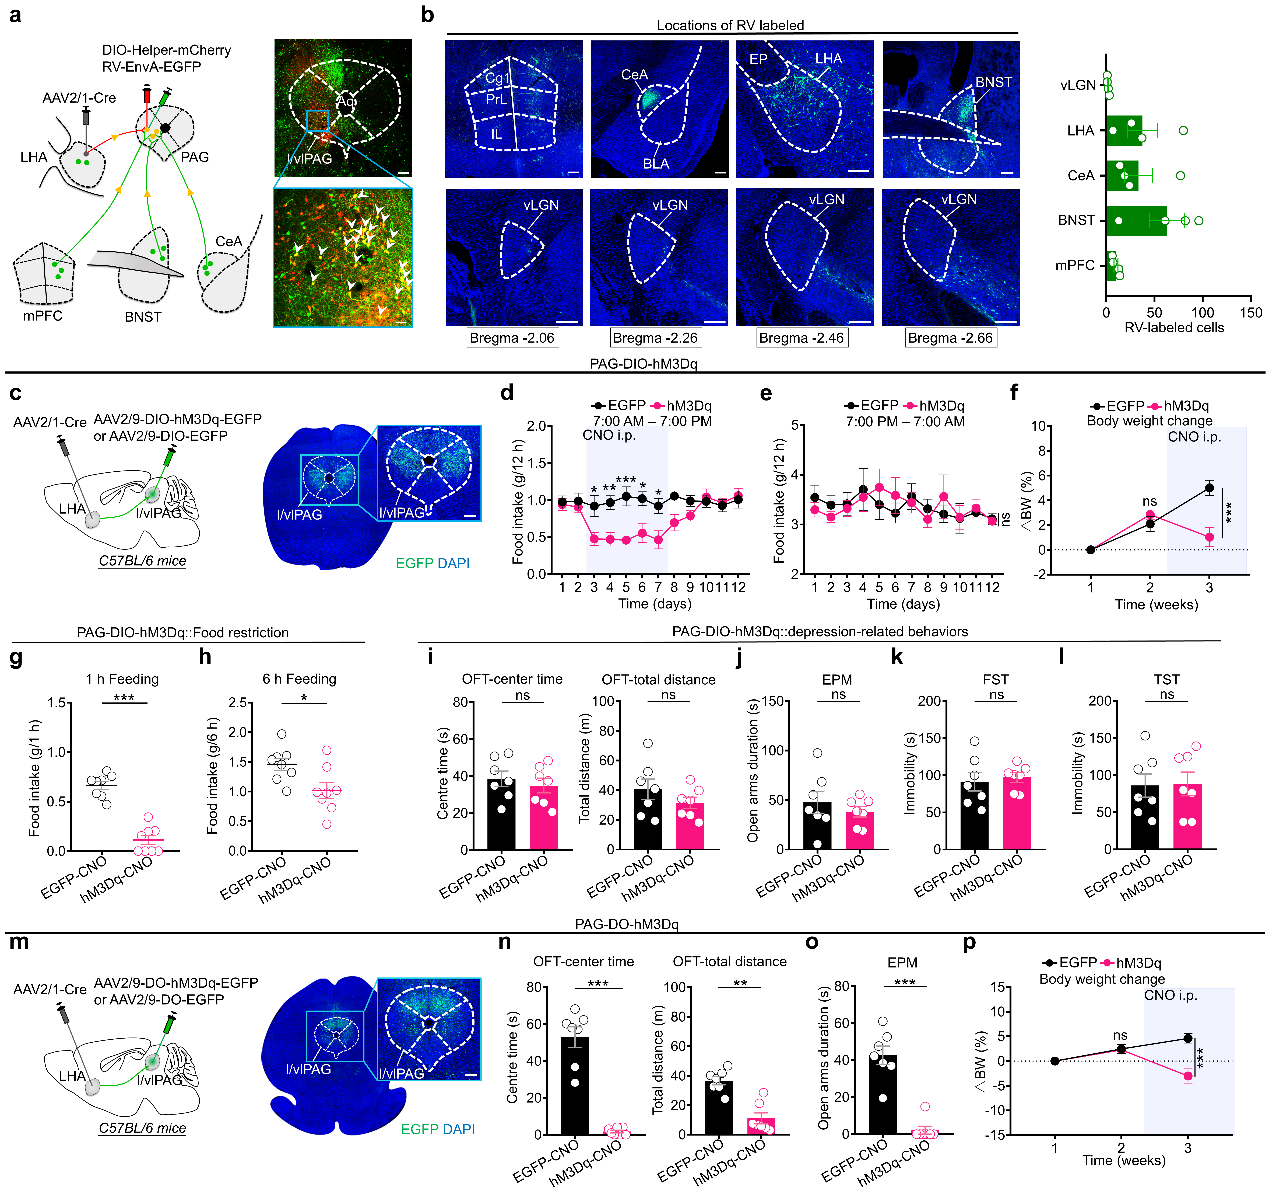


**Figure S4. The** **vLGN-l/vlPAG pathway and the vLGN-LH-****l/vlPAG pathway do not regulate the l/vlPAG within the same cell population, Related to Figure 8**

**a**, Left, Schematic of the strategy for monosynaptic retrograde rabies virus tracing LHA-l/vlPAG pathway in l/vlPAG postsynaptic neurons. Right: Injection site of l/vlPAG illustrating the star cells (yellow); scale bar, 200 μm (upper), 50 μm (bottom).

**b**, Representative images of the areas projecting to l/vlPAG neurons that received LHA direct input; scale bar, 200 μm. Right: showing quantifications of neurons projecting to l/vlPAG neurons in different brain regions (n= 4 mice); scale bar, 200 μm.

**c**, Scheme showing specific injection of l/vlPAG postsynaptic neurons with DIO-hM3Dq or DIO-EGFP; scale bar, 200 μm

**d-f**, Changes in food intake during the daytime (**d**) and the nighttime (**e**) in mCherry, hM3Dq groups of chow-fed mice; n=8 mice/group. Weekly time course of body weight, and i.p. injection of CNO start from the third week(**f**); n=8 mice/group.

**g-h**, 1-hour food intake test (**g**) and 6-h food intake test (**h**) in the EGFP-CNO and hM3Dq-CNO groups of chow-fed; n=8 mice/group.

**i-l**, Depressive- and anxiety-like behaviors in different experimental groups; n= 7 mice/group. open field test (OFT) (**i**), elevated plus maze (EPM) (**j**), forced swim test (FST) (**k**), and tail suspension test (TST) (**l**). All mice received LHA injection of AAV2/1-cre. EGFP-CNO: mice that received l/vlPAG injection of AAV2/9-DIO-EGFP and i.p. injection of CNO. hM3Dq-CNO: mice that received l/vlPAG injection of AAV2/9-DIO-hM3Dq-EGFP and i.p. injection of CNO.

**m**, Scheme showing specific injection of l/vlPAG postsynaptic neurons without LHA input with DO-hM3Dq or DO-EGFP; scale bar, 200 μm.

**n-o**, OFT (**n**), EPM (**o**) in different experimental groups, all mice received LHA injection of AAV2/1-cre. EGFP-CNO: mice that received l/vlPAG injection of AAV2/9-DIO-EGFP and i.p. injection of CNO. hM3Dq-CNO: mice that received l/vlPAG injection of AAV2/9-DO-hM3Dq-EGFP and i.p. injection of CNO; n=7 mice/group.

**p**, Weekly time course of body weight in the EGFP-CNO and hM3Dq-CNO groups of chow-fed, and i.p. injection of CNO start from the third week; n=8 mice/group.

One-way ANOVA with Sidak’s multiple-comparisons test was used in **g**, **h**, **i**, **j**, **k**, **l**, **n**, **o**,and **p**. Two-way ANOVA with Sidak’s multiple-comparisons test was used in **d**, **e**, **f**,and **p**. *p < 0.05; **p < 0.001; ***p < 0.0001; ns, no significant difference. Error bars indicate the mean ± s.e.m.
